# Supplementary material for: Holarctic Species in the Pluteus podospileus Clade: Description of Six New Species and Reassessment of Old Names
Source: MDPI journal article supplement (doi:10.3390/jof9090898), 2023-08-31

Supplementary Figure 1. Fifty percent majority rule consensus tree from the BI analysis of the nrITS+ TEF1- $\alpha$  dataset.

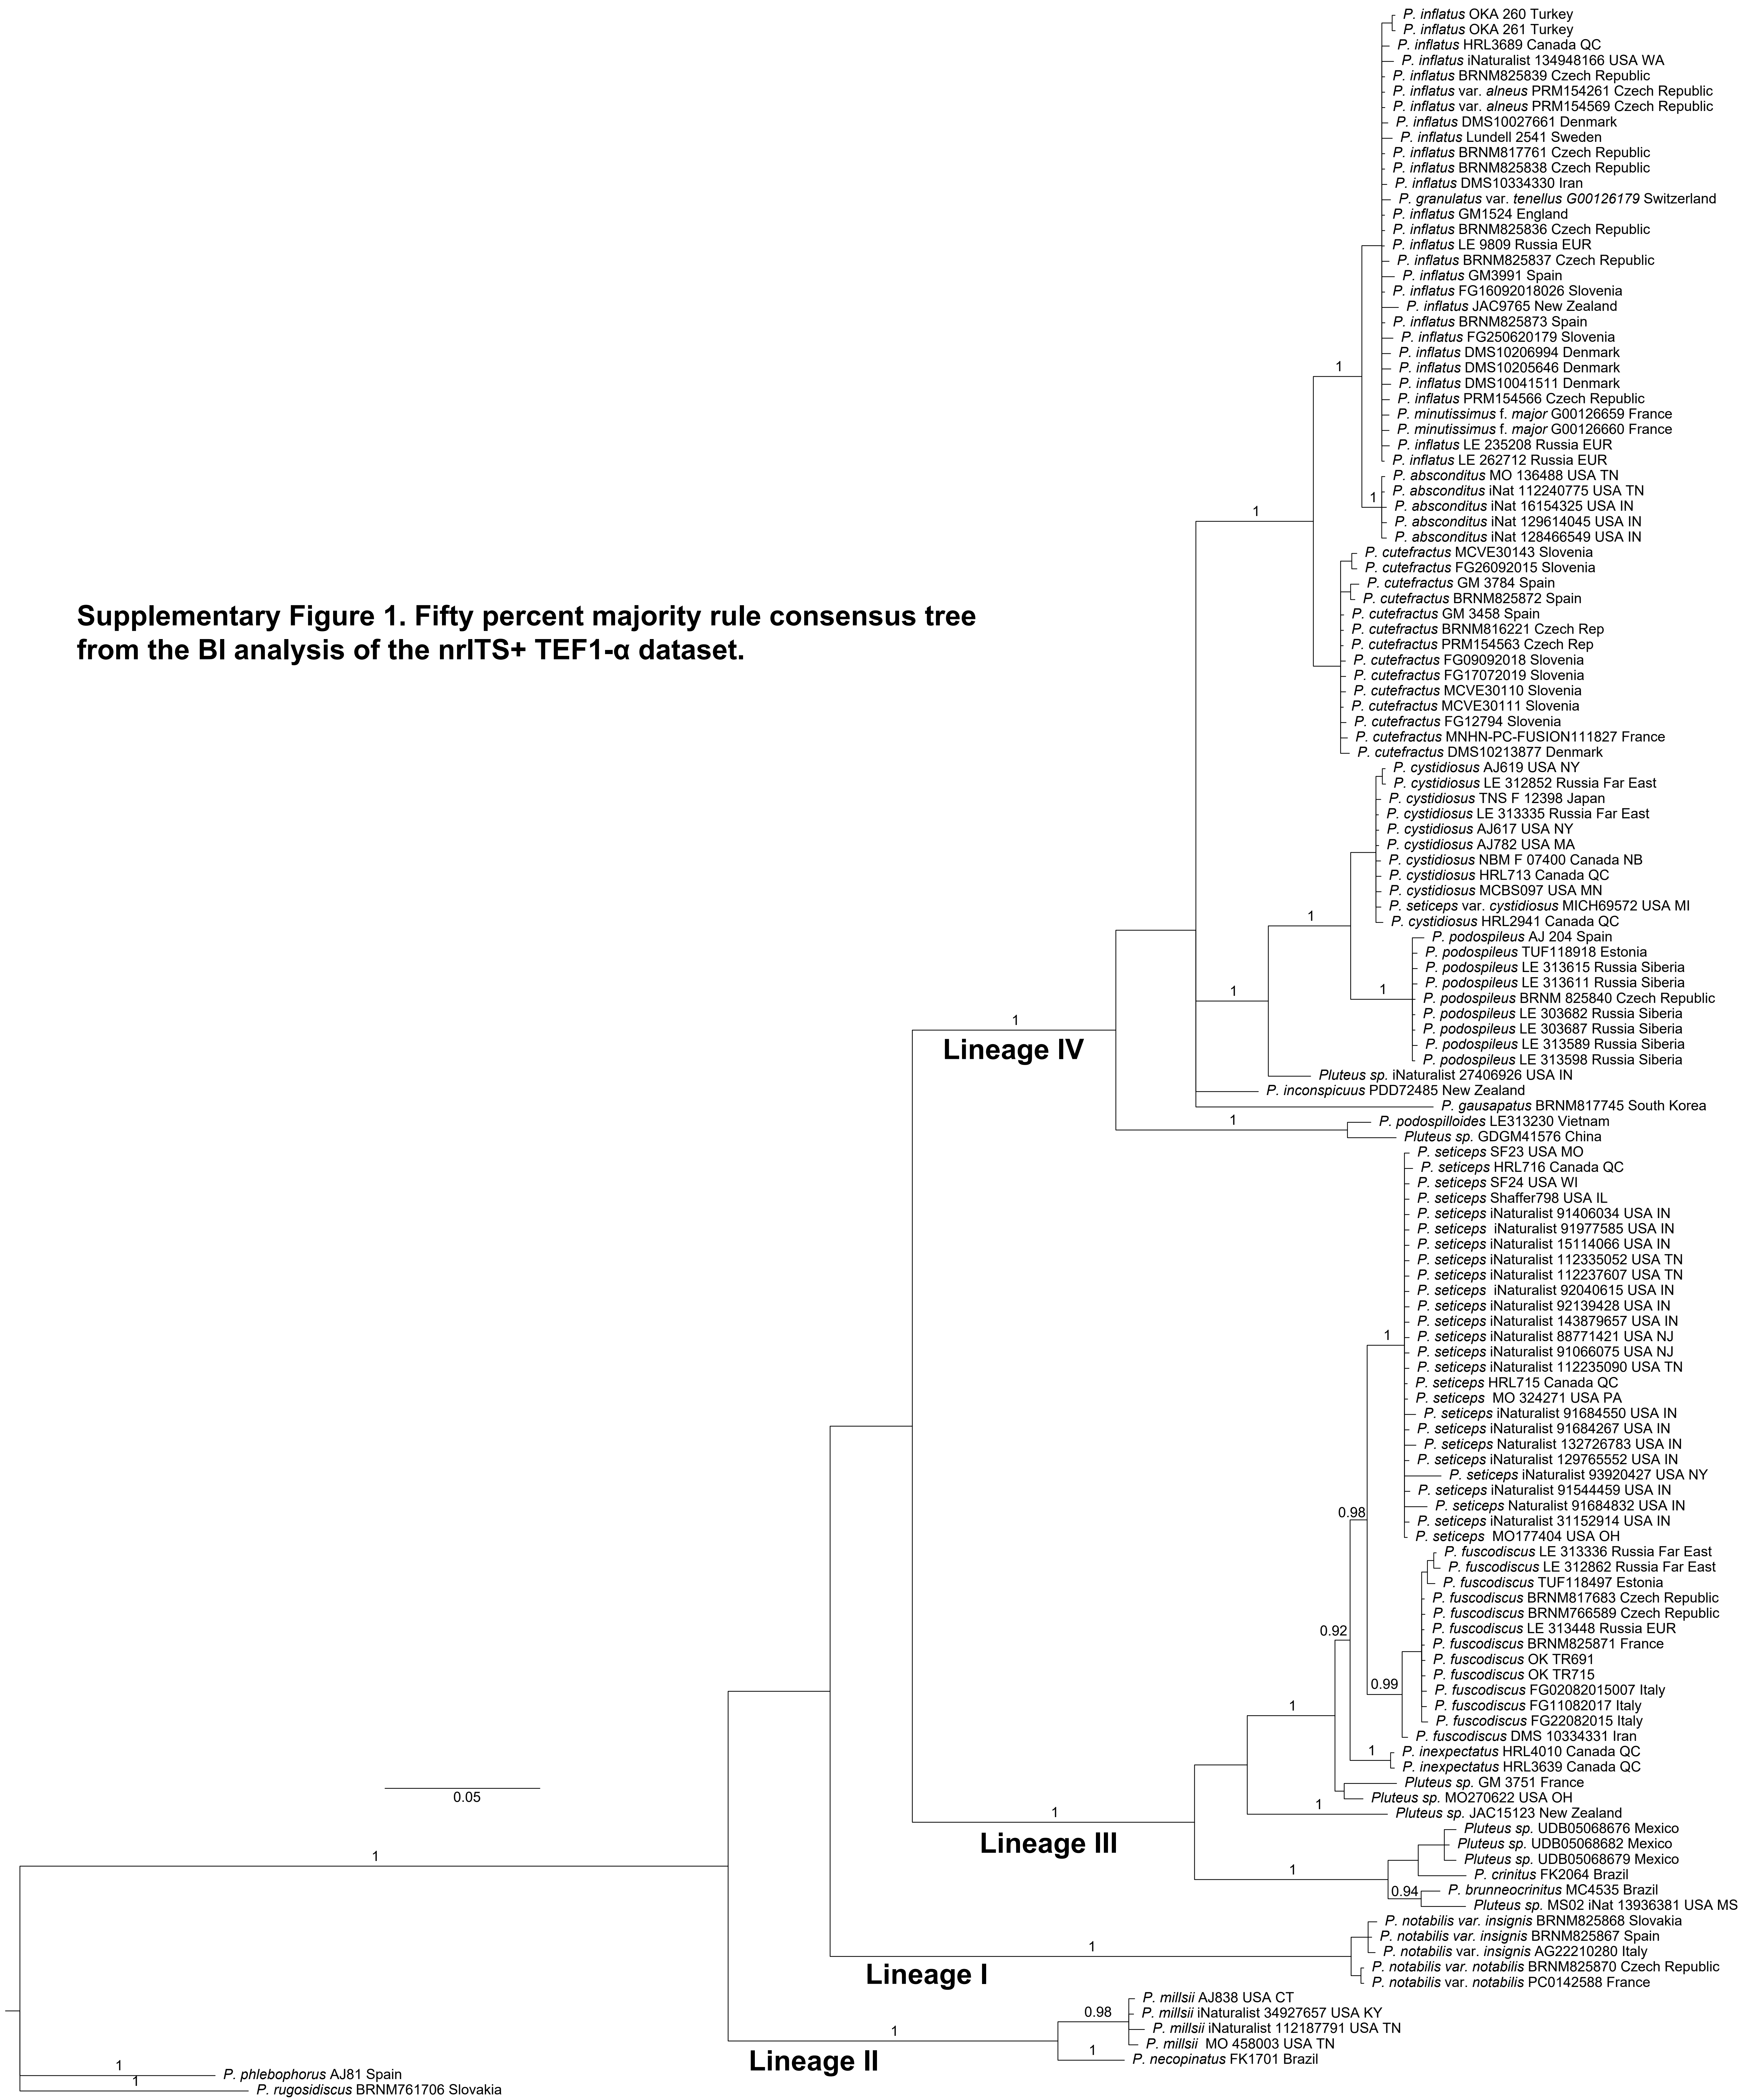

Supplement: s1 [file s1]
