# Supplementary figures and images for: Holarctic Species in the Pluteus podospileus Clade: Description of Six New Species and Reassessment of Old Names
Source: MDPI journal article supplement (doi:10.3390/jof9090898), 2023-08-31

Supplementary Figure 2. Best tree from the ML analysis of the nrITS dataset

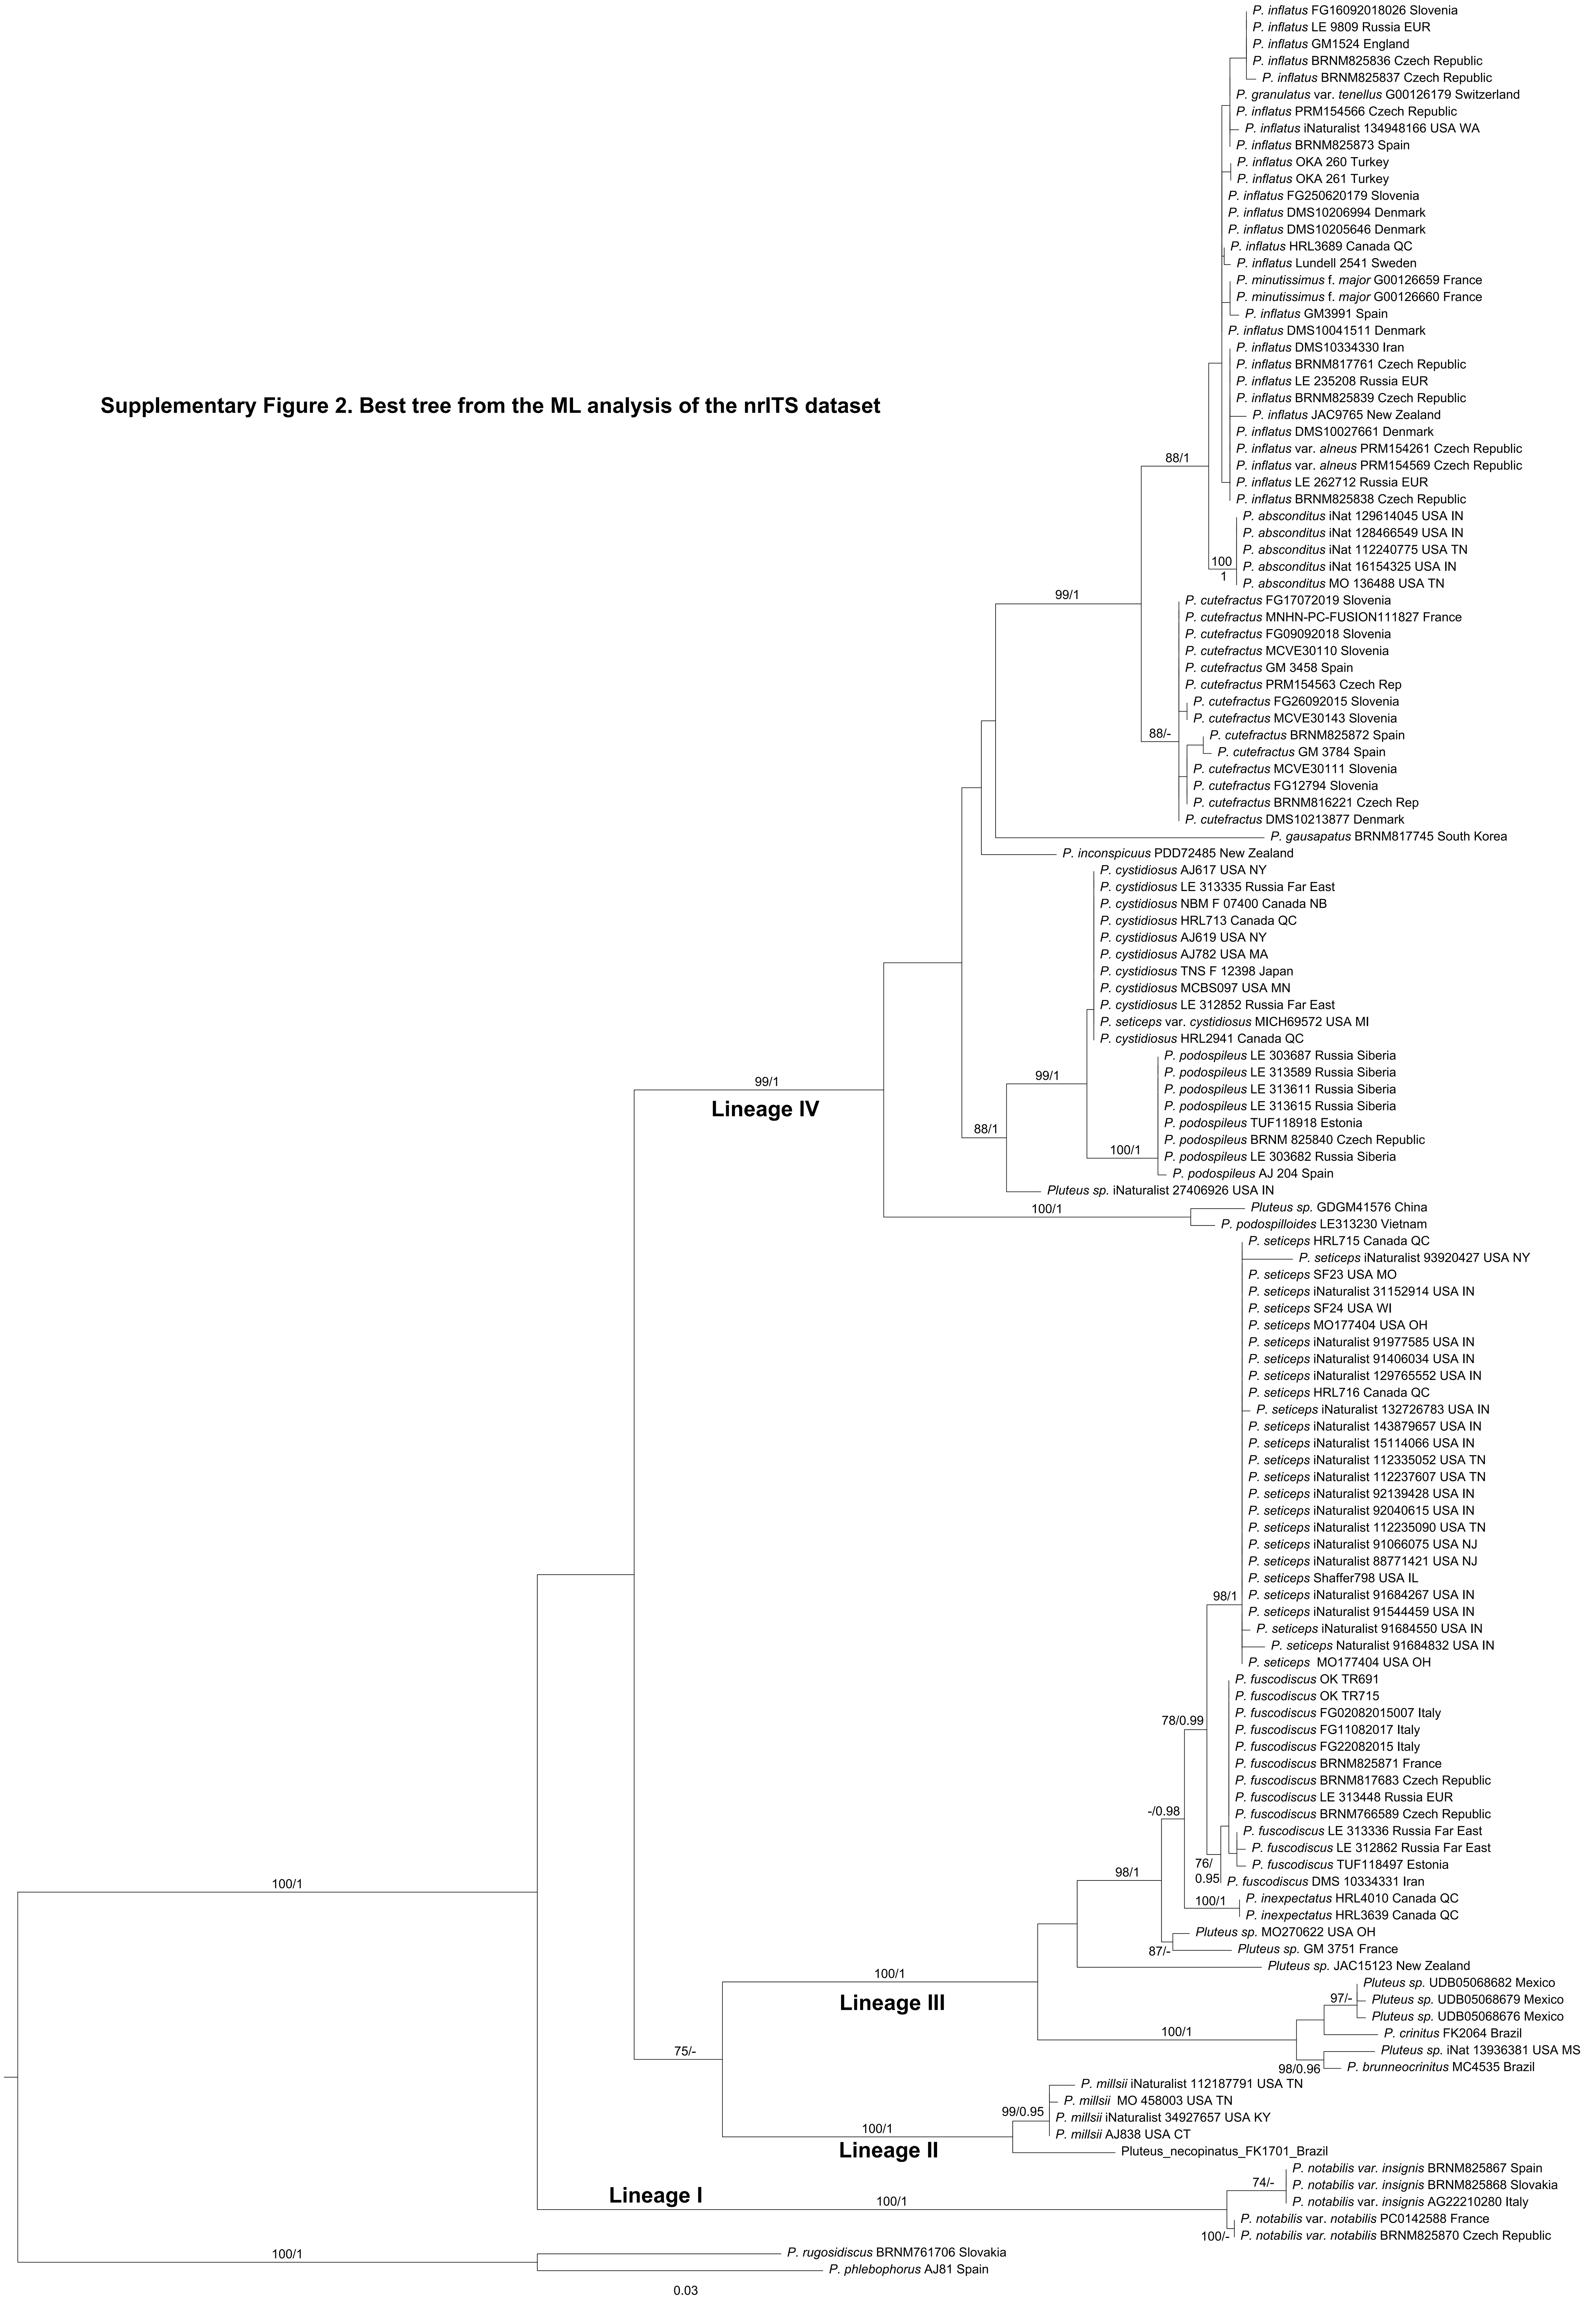

Supplement: s1 [file s1]
